# Supplementary material for: 3D Filaments Based on Polyhydroxy Butyrate—Micronized Bacterial Cellulose for Tissue Engineering Applications
Source: MDPI journal article supplement (doi:10.3390/jfb14090464), 2023-09-09

## Supplementary Material

**Figure S1.** Changes of the maximum decomposition temperature of PHB/BC related to the BC composition. Data obtained from Figure 2.

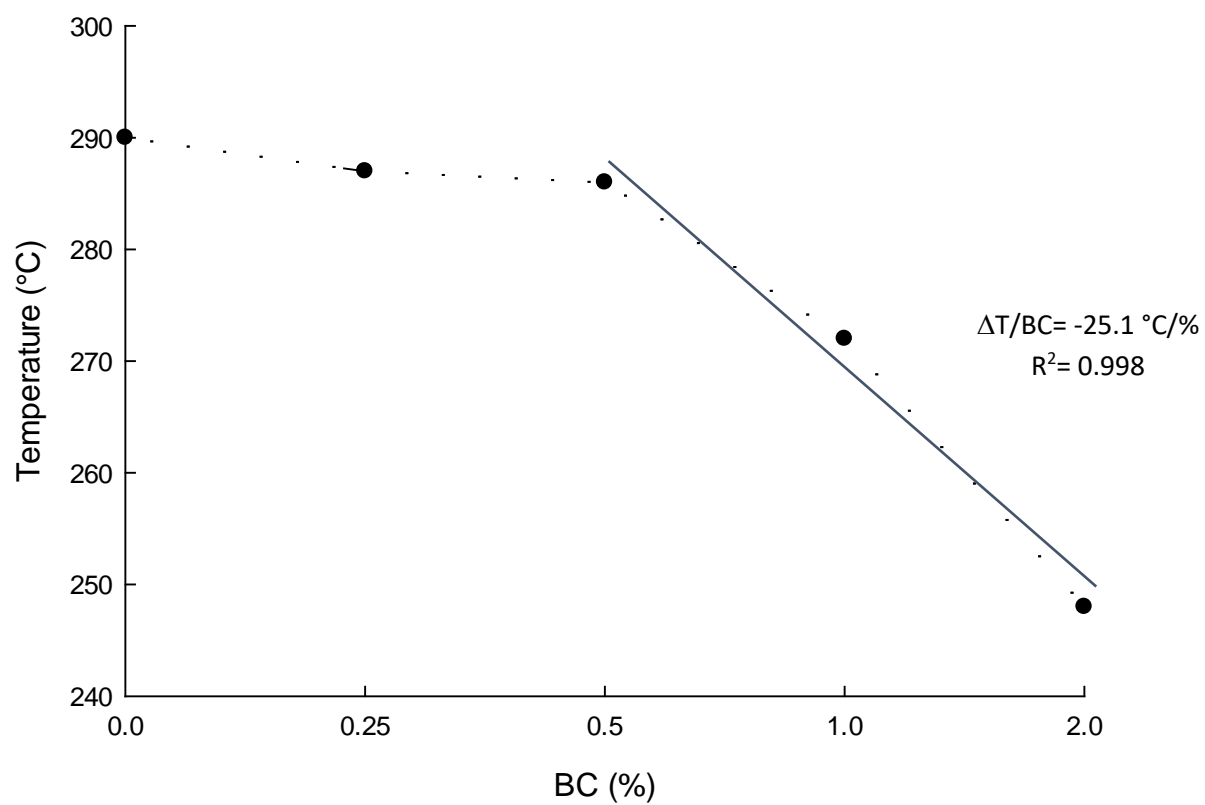

Supplement: s1 [file s1]
